# Supplementary material for: Novel pyrene- and anthracene-based Schiff base derivatives as Cu2+and Fe3+fluorescence turn-on sensors and for aggregation induced emissions
Source: Royal Society of Chemistry journal article supplement (doi:10.1039/c2ta00574c), 2012-11-05
Supplement: c2ta00574c.pdf [file c2ta00574c.pdf]

## Supporting Information

### **Novel pyrene- and anthracene-based Schiff base derivatives as Cu<sup>2+</sup> and Fe<sup>3+</sup> fluorescence turn-on sensors and for aggregation induced emissions**

Muthaiah Shellaiah, Yen-Hsing Wu, Ashutosh Singh, Mandapati V. Ramakrishnam Raju and Hong-Cheu Lin\*

*\*Department of Materials Science and Engineering, National Chiao Tung University, Hsinchu*

*30049, Taiwan (ROC)*

*linhc@mail.nctu.edu.tw*

#### **Table of contents:**

**Experimental section (S1)**

**General information (S1)**

**Synthesis of F1 and F2 (S1-S2)**

**<sup>1</sup>H NMR, <sup>13</sup>C NMR and Mass (FAB) Scanned spectra of P1 and A1 (S3-S5)**

**Absorbance spectra and stoichiometries of sensor responses of P1 and A1 (S6-S7)**

**Detection limit (LOD) calculations and sensor reversibilities of P1 and A1 with Cu<sup>2+</sup> and Fe<sup>3+</sup> ions, respectively. (S8-S9)**

**P1+Cu<sup>2+</sup> and A1+Fe<sup>3+</sup> sensor responses as a function of pHs and PL spectra of P1 and A1 towards pH solutions (S10-S11)**

**Determination of association constants of sensor responses of P1 and A1 (S12)**

**Time dependent sensor responses of P1 and A1 (S13)**

**Counter ions effect on sensor responses (S14)**

**Absorbance spectra, quantum yield (Φ) changes of P1 and A1, upon increasing the concentrations of water (0-90%) as a function of time (S14-S16)**

**Time resolved fluorescence spectra (TRPL) of P1 in CH<sub>3</sub>CN (0% and 80% of water) and A1 in THF (0% and 60% of water) measured after 18 hours (S17)**

**TRPL decay constants of P1 and A1 (Table S1) (S18)**

**Notes and References (S18)**

## Experimental Section

### General Information

All anhydrous reactions were carried out by standard procedures under nitrogen atmosphere to avoid moisture. The solvents were dried by distillation over appropriate drying agents. Reactions were monitored by TLC plates and column chromatography was generally performed on silica gel.  $^1\text{H}$  and  $^{13}\text{C}$  NMR were recorded on a 300 MHz spectrometer. The chemical shifts ( $\delta$ ) are reported in ppm and coupling constants (J) in Hz and relative to TMS (0.00) for  $^1\text{H}$  and  $^{13}\text{C}$  NMR, (s, d, t, q, m, and dd means single, double, ternary, quadruple, multiple, and doublet of doublet, respectively), and d-chloroform (7.26) & (77.0), d-THF (3.58) & (66.6) was used as references for  $^1\text{H}$  and  $^{13}\text{C}$  NMR, respectively. Mass spectra (FAB) were obtained on the respective mass spectrometer. Elemental analysis was carried out by Elemental Vario EL. Absorption and fluorescence spectra were measured on V-670 Spectrophotometer and F-4500 Fluorescence Spectrophotometer, respectively. Identification and purity of the compounds **P1** and **A1** were characterized by NMR ( $^1\text{H}$  &  $^{13}\text{C}$ ), and Mass (FAB). Time-resolved photoluminescence (TRPL) spectra were measured using a home-built single photon counting system. Excitation was performed using a 450 and 500 nm diode laser (Picoquant PDL-200, 50 ps fwhm, 2 MHz). The signals collected at the excitonic emissions of solutions were connected to a time-correlated single photon counting card (TCSPC, Picoquant Timeharp 200). The emission decay data were analyzed with the biexponential kinetics in which two decay components were derived. The lifetime values ( $\tau_1$  and  $\tau_2$ ) and pre-exponential factors ( $A_1$  and  $A_2$ ) were determined and summarized. 0-14 pH buffers were freshly prepared as per the literature.<sup>1</sup>

### Sensor titrations

Compounds **P1** and **A1** were dissolved in  $\text{CH}_3\text{CN}$  and THF at  $1 \times 10^{-5}$  M concentration.  $\text{Li}^+$ ,  $\text{Ag}^+$ ,  $\text{K}^+$ ,  $\text{Na}^+$ ,  $\text{Cs}^+$ ,  $\text{Ni}^{2+}$ ,  $\text{Fe}^{3+}$ ,  $\text{Co}^{2+}$ ,  $\text{Zn}^{2+}$ ,  $\text{Cd}^{2+}$ ,  $\text{Pb}^{2+}$ ,  $\text{Ca}^{2+}$ ,  $\text{Cr}^{3+}$ ,  $\text{Mg}^{2+}$ ,  $\text{Cu}^{2+}$ ,  $\text{Mn}^{2+}$ ,  $\text{Hg}^{2+}$ ,  $\text{Fe}^{2+}$ , and  $\text{Ag}^{2+}$  metal cations were dissolved in water medium at  $1 \times 10^{-3}$  M concentration from their respective chloro compounds. 50% Pent methyl diethylene triamine (**PMDTA**) was dissolved in  $\text{CH}_3\text{CN}$  and THF, respectively for sensor reversibilities. For counter ion effect on  $\text{Cu}^{2+}$  and  $\text{Fe}^{3+}$  sensors responses  $\text{Cu}(\text{OAc})_2$ ,  $\text{Cu}(\text{NO}_3)_2$ ,  $\text{CuCl}_2$ ,  $\text{CuBr}_2$ ,  $\text{Cu}(\text{ClO}_4)_2$ ,  $\text{Cu}(\text{IO}_3)_2$  and  $\text{CuSO}_4$  and  $\text{K}_3[\text{Fe}(\text{CN})_6]$ ,  $\text{Fe}(\text{NO}_3)_3$ ,  $\text{FeCl}_3$ ,  $\text{FeF}_3$ ,  $\text{Fe}(\text{OH})_3$ ,  $\text{Fe}(\text{ClO}_4)_3$ ,  $\text{Fe}(\text{IO}_3)_3$  and  $\text{Fe}_2(\text{SO}_4)_3$  were dissolved in water medium at  $1 \times 10^{-3}$  M concentration. However,  $\text{Cu}(\text{OH})_2$  was dissolved in  $\text{NH}_4\text{OH}$  medium at  $1 \times 10^{-3}$  M concentration.

### General procedure<sup>2,3</sup> for the synthesis of compounds **P1** and **A1**

To 1 equiv. of aromatic amine derivatives in 50 ml of methanol, 1 equiv. of aromatic aldehyde derivatives were added with constant stirring under nitrogen and then refluxed for 12 hrs. The reaction was monitored by TLC, after completion, the reaction mixture was cooled and the solvent was evaporated to give the crude product, which was recrystallized from ethanol to afford pure compounds (**P1** and **A1**).

**2-(pyren-1-ylmethyleneamino)phenol (P1)**: Bright yellow solid; 98% yield;  $^1\text{H}$  NMR (300 MHz,  $\text{CDCl}_3$ )  $\delta$ : 6.95 – 6.99 (t,  $J = 6.0$  Hz, 1H), 7.03 (d,  $J = 6.0$ , 1H), 7.07 – 7.13 (d,  $J = 9.0$  Hz, 1H), 7.25 – 7.50 (m, 2H), 7.96 – 8.16 (m, 7H), 8.66 – 8.71 (dd,  $J = 7.5$  Hz, 2H), 9.60 (s, 1H (-OH));  $^{13}\text{C}$  NMR (300 MHz,  $\text{CDCl}_3$ )  $\delta$ : 115.04, 115.98, 120.20, 121.63, 123.41, 125.77, 125.95, 126.03,

127.19, 128.53, 129.28, 133.41, 136.51, 152.38, 155.10; FAB:  $m/z = 321$  ( $M^+$ , 100%). Anal. Calcd for  $C_{23}H_{15}NO$ : C, 85.96; H, 4.70; N, 4.36. Found: C, 85.54; H, 4.68; N, 4.35.

**2-((anthracen-2-ylimino)methyl)phenol (A1):** Pale-yellow solids; 71% yield;  $^1H$  NMR (300 MHz, d-THF)  $\delta$ : 6.95 – 7.03 (t,  $J = 12$  Hz, 2H), 7.07 (d,  $J = 9.0$  Hz, 1H), 7.96 – 8.27 (m, 8H), 8.71 (s, 1H), 9.13 - 9.29 (m, 2H), 12.96 (s, 1H (-OH));  $^{13}C$  NMR (300 MHz,  $CDCl_3$ )  $\delta$ : 116.60, 118.35, 120.63, 123.41, 125.95, 126.03, 126.94, 127.19, 128.53, 129.28, 130.91, 131.60, 134.41, 138.91, 154.17, 156.59; FAB:  $m/z = 297$  ( $M^+$ , 100%). Anal. Calcd for  $C_{21}H_{15}NO$ : C, 84.82; H, 5.08; N, 4.71. Found: C, 84.50; H, 5.07; N, 4.73.

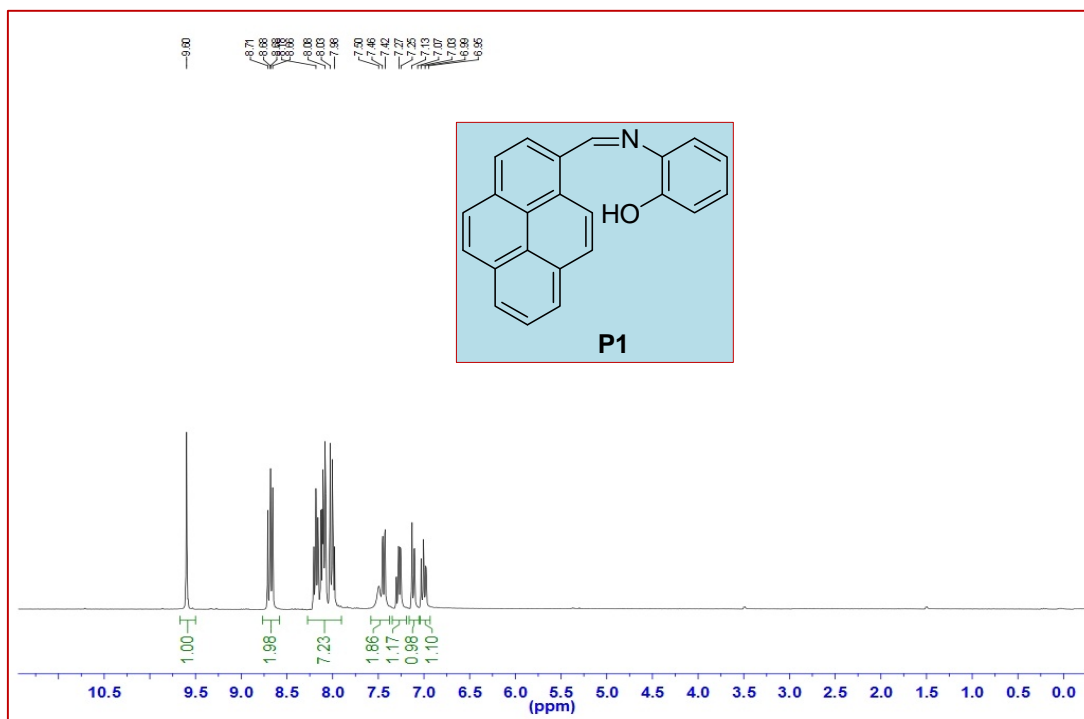

Fig. S1 <sup>1</sup>H NMR spectrum of P1 in d-Chloroform.

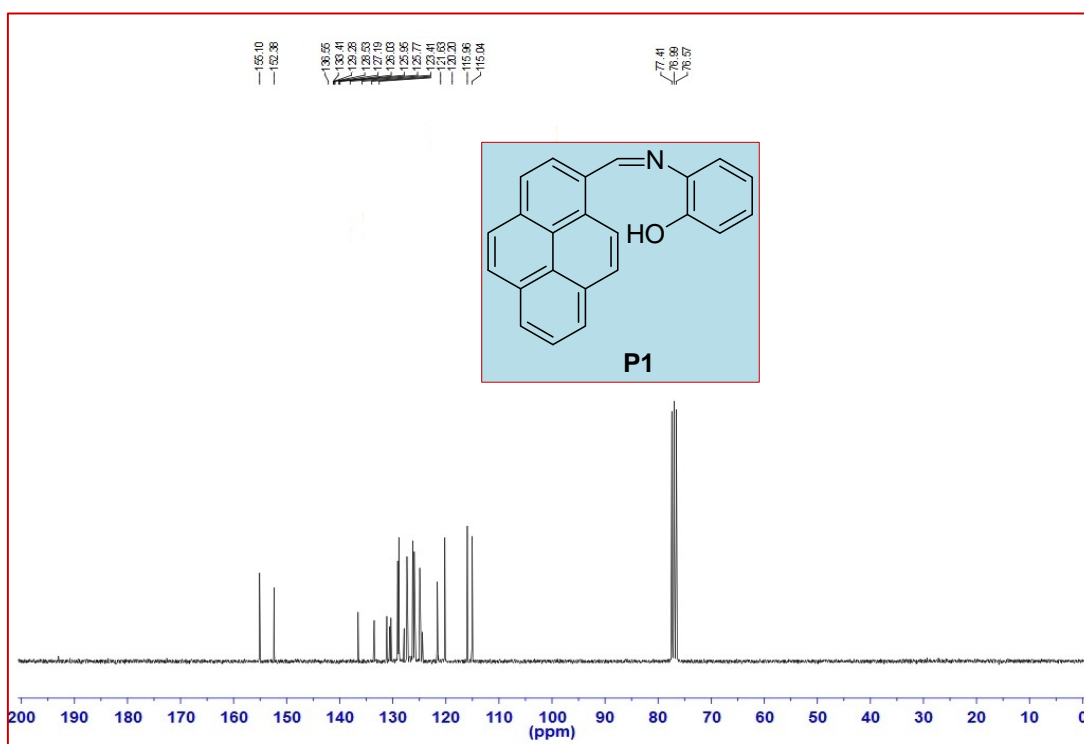

Fig. S2 <sup>13</sup>C NMR spectrum of P1 in d-Chloroform.

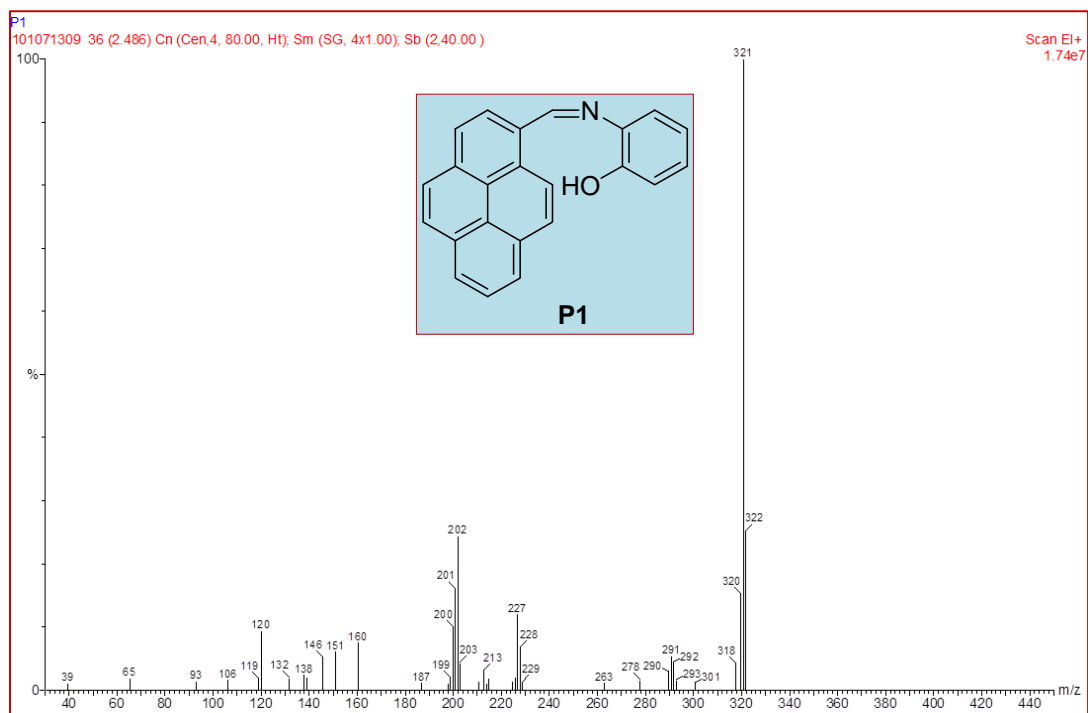

**Fig. S3** Mass (FAB) spectrum of **P1**.

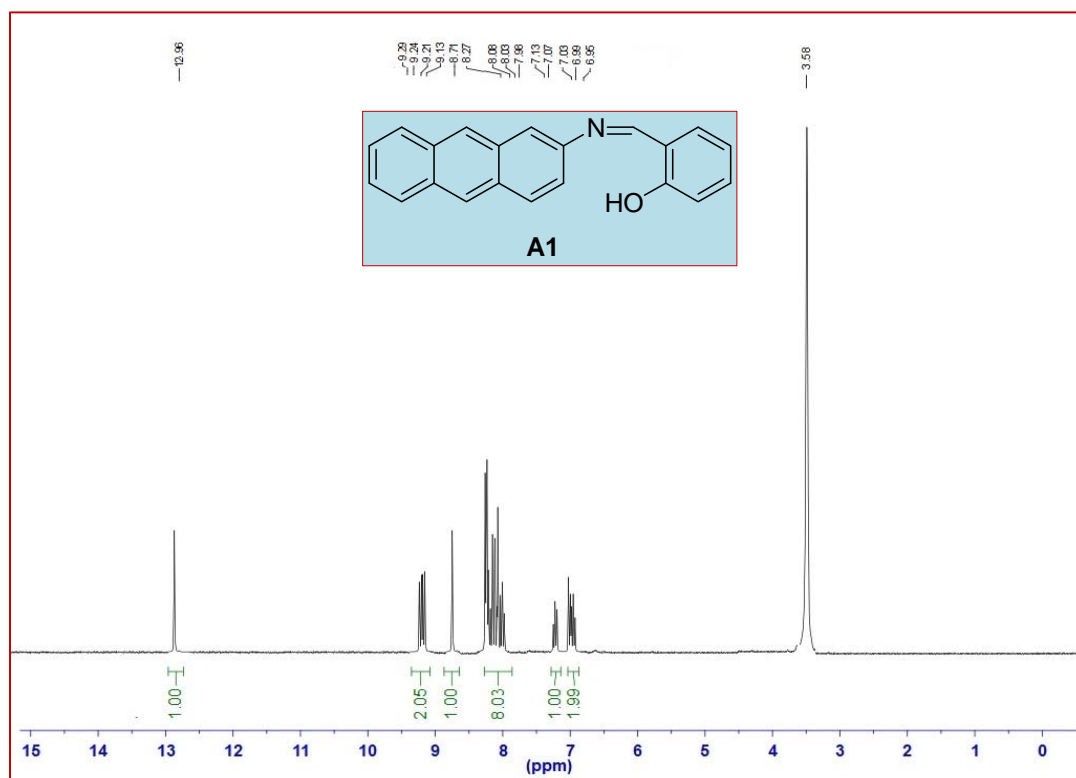

**Fig. S4**  $^1\text{H}$  NMR spectrum of **A1** in d-THF.

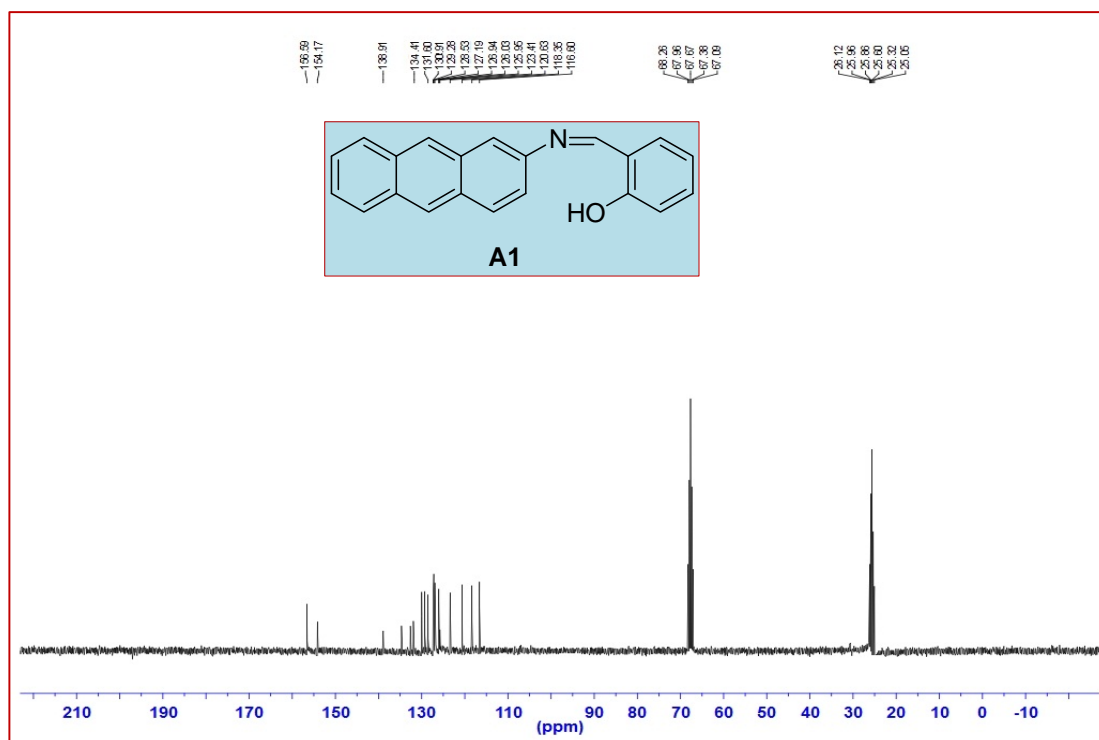

Fig. S5  $^{13}\text{C}$  NMR spectrum of A1 in  $d\text{-THF}$ .

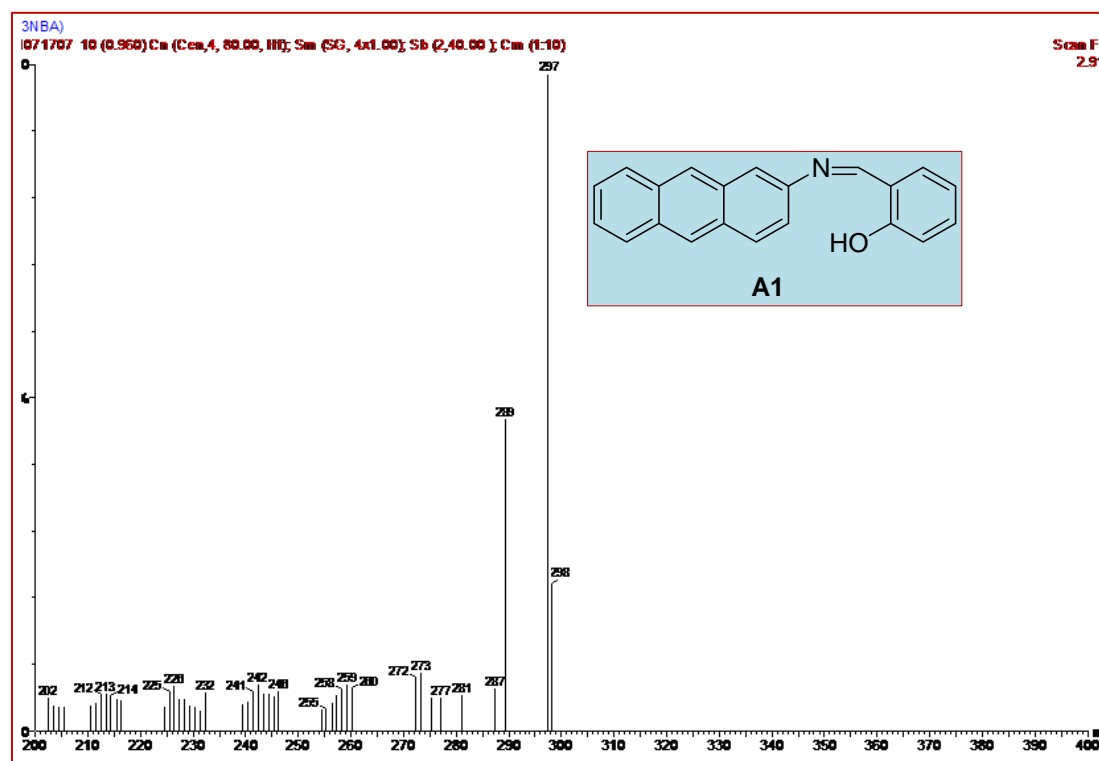

Fig. S6 Mass (FAB) spectrum of A1.

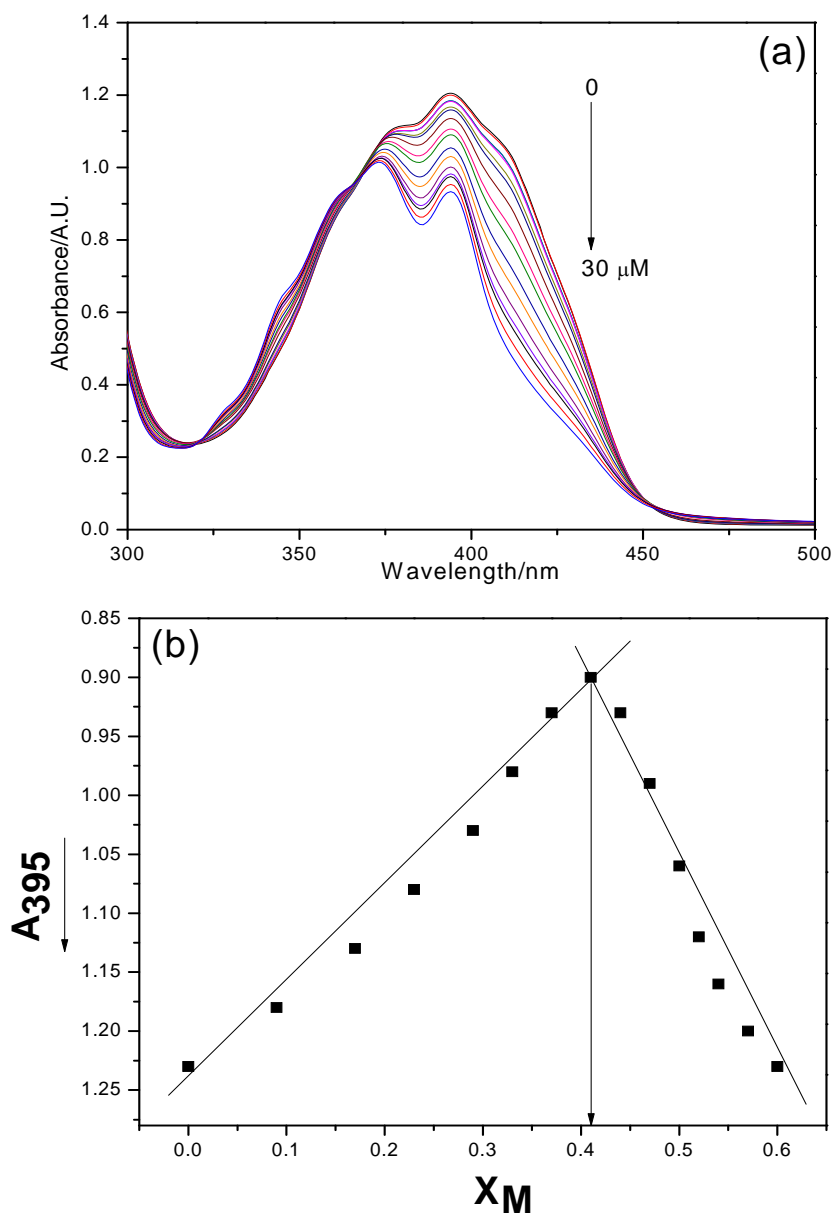

**Fig. S7** Absorbance spectral changes of (a) **P1** ( $1 \times 10^{-5}$  M) in CH<sub>3</sub>CN, titrated with 0-30 μM (with an equal span of 3 μM) of Cu<sup>2+</sup> ions in H<sub>2</sub>O and (b) stoichiometry calculations based on absorbance changes at 395 nm;  $X_M = [\text{Cu}^{2+}] / [\text{Cu}^{2+}] + [\text{P1}]$ ; where  $X_M$  = mole fraction, [Cu<sup>2+</sup>] and [P1] are concentrations of Cu<sup>2+</sup> and P1; **P1**+Cu<sup>2+</sup> = 2:1 stoichiometry (ca. 0.412).

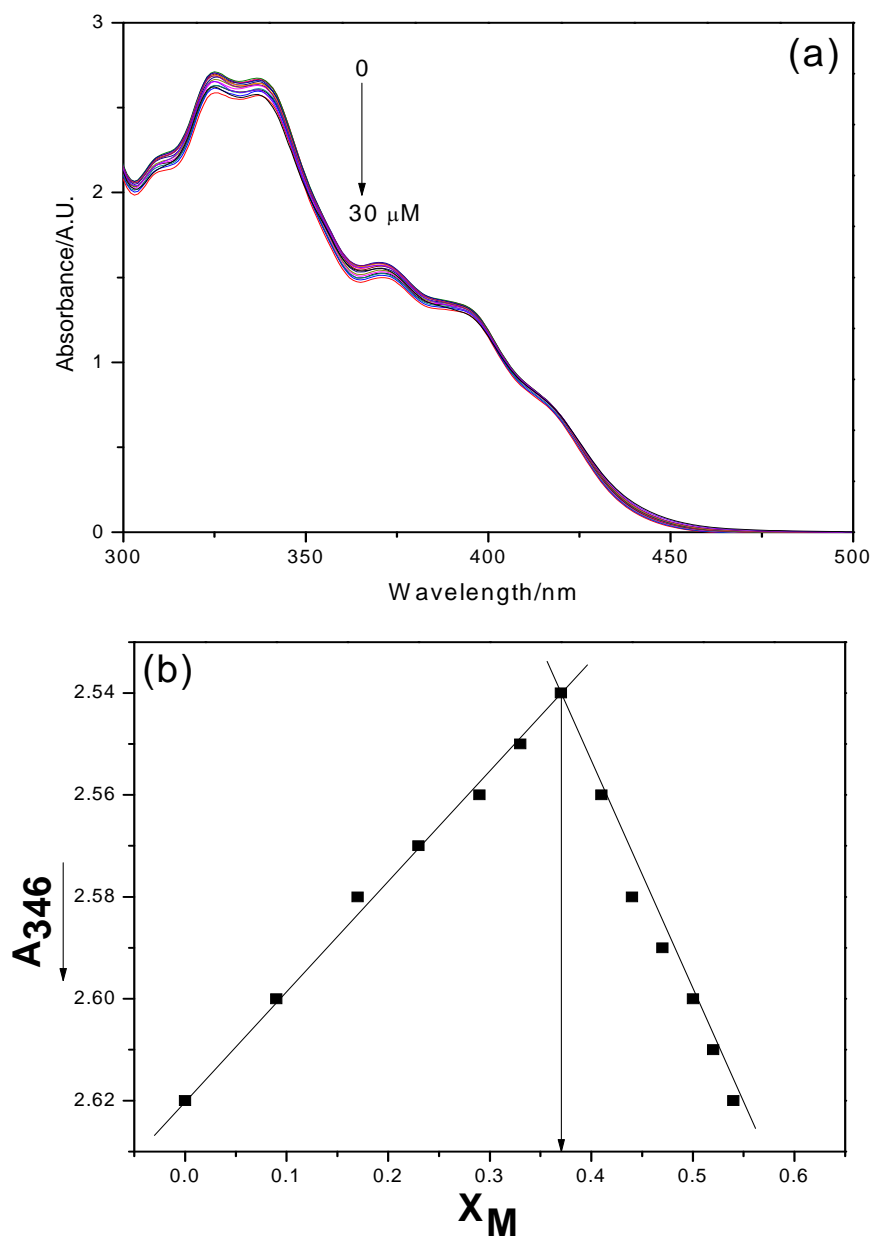

**Fig. S8** Absorbance spectral changes of (a) **A1** ( $1 \times 10^{-5}$  M) in THF, titrated with 0-30  $\mu$ M (with an equal span of 3  $\mu$ M) of  $\text{Cu}^{2+}$  ions in  $\text{H}_2\text{O}$  and (b) stoichiometry calculations based on absorbance changes at 395 nm;  $X_M = [\text{Fe}^{3+}] / [\text{Fe}^{3+}] + [\text{A1}]$ ; where  $X_M$  = mole fraction,  $[\text{Cu}^{3+}]$  and  $[\text{A1}]$  are concentrations of  $\text{Cu}^{2+}$  and **A1**;  $\text{A1} + \text{Fe}^{3+} = 2:1$  stoichiometry (ca. 0.370).



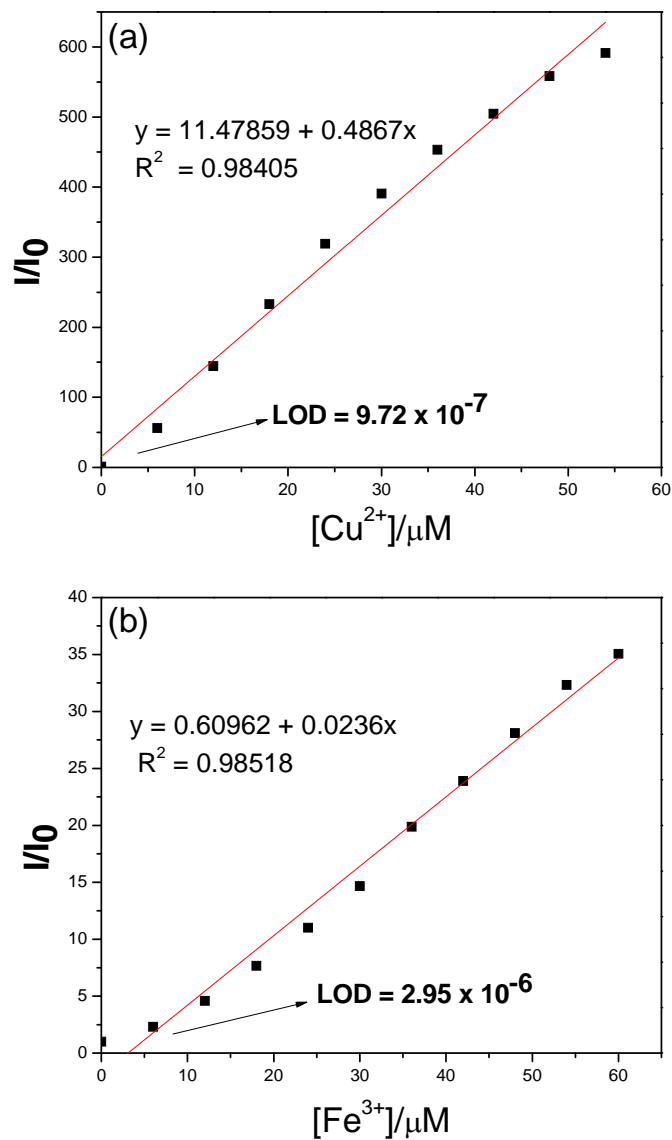

**Fig. S9** Standard deviations and linear fitting for detection limit calculations of (a) **P1** +  $Cu^{2+}$  and (b) **A1** +  $Fe^{2+}$ . [Note: Detection limit calculations were based on relative fluorescence intensity changes versus respective metal ion concentrations].

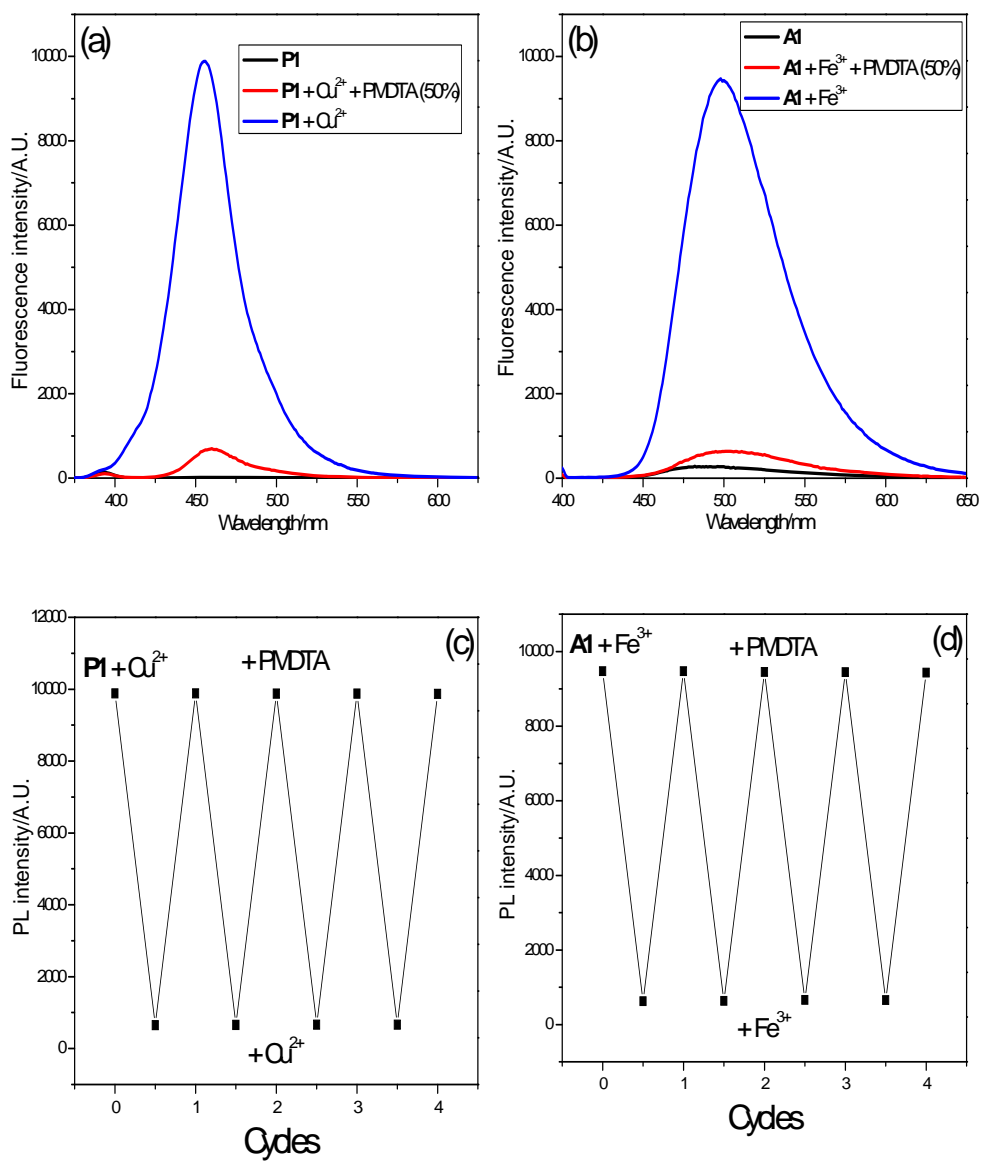

Fig. S10 Sensor reversibilities and reversible cycles of (a, c) P1 + Cu<sup>2+</sup> and (b, d) A1 + Fe<sup>3+</sup>.

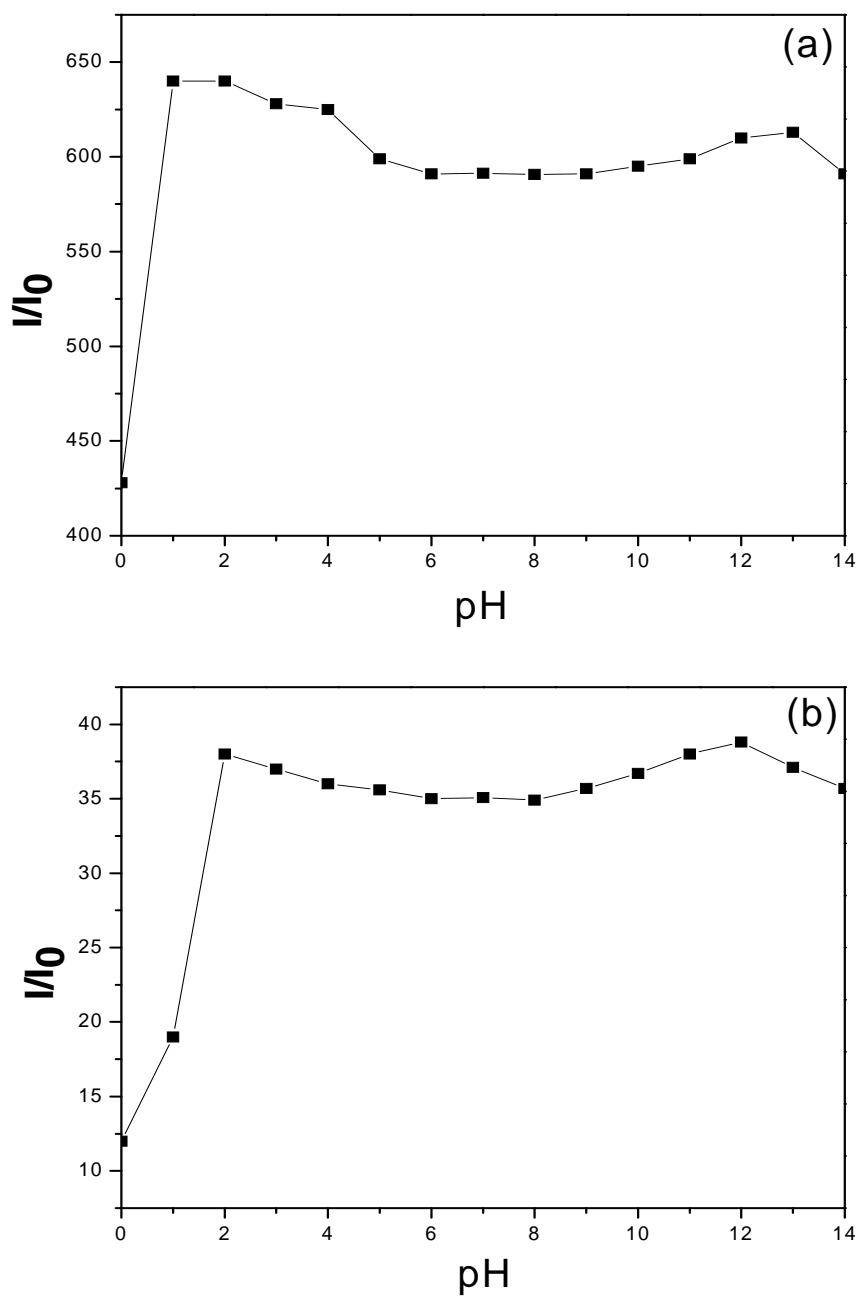

**Fig. S11** Sensor responses of (a) **P1** + Cu<sup>2+</sup> and (b) **A1** + Fe<sup>3+</sup>, as a function of pHs (0-14).

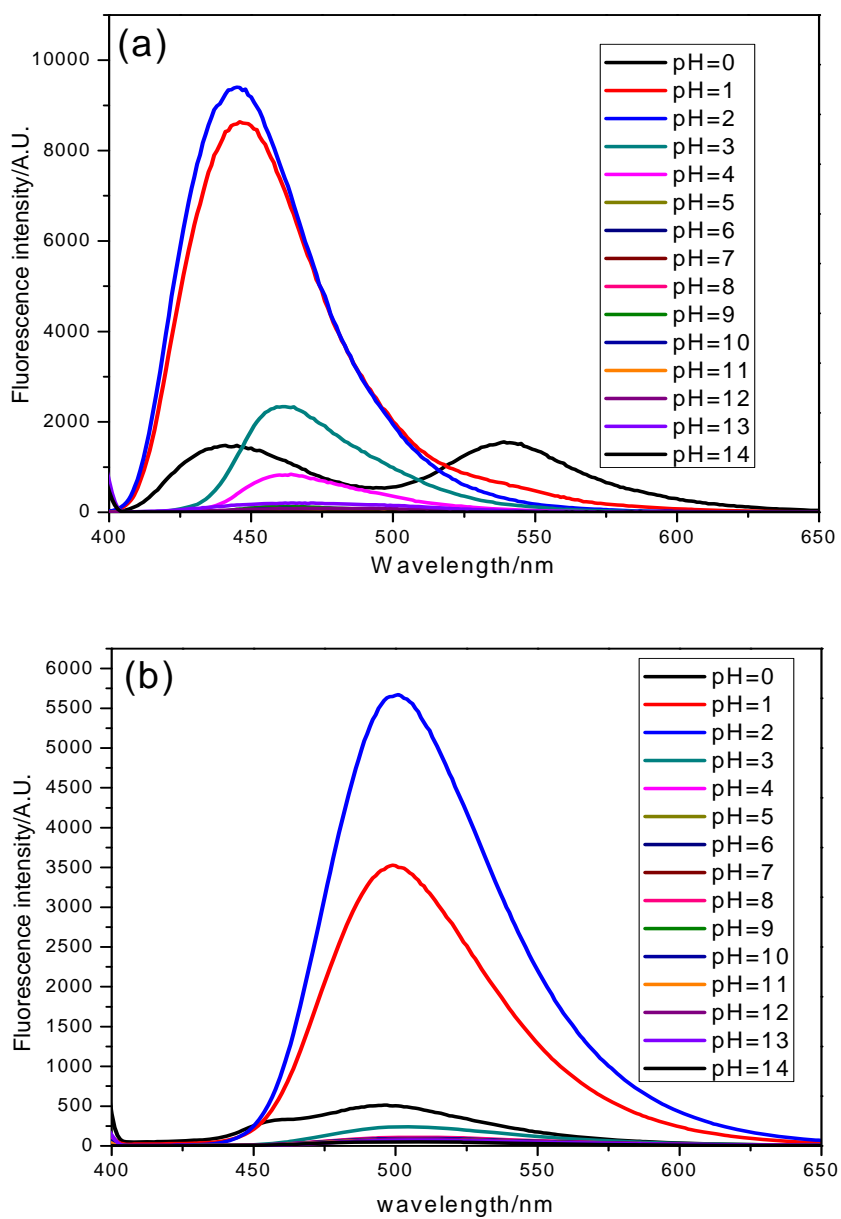

**Fig. S12** PL spectral changes of (a) **P1** (20 μM) in CH<sub>3</sub>CN and (b) **A1** (20 μM) in THF upon the addition of 100 μM of pH (0-14) buffers in H<sub>2</sub>O.

### Determination of Association Constant:<sup>4,5</sup>

Assuming a 2:1 complex formation, the association constant was calculated on the basis of the titration curves of the sensor **P1** and **A1** with  $\text{Cu}^{2+}$  and  $\text{Fe}^{3+}$ . Association constants were determined by a linear least square fitting of data with the following equation as a referenced method.

$$[\text{Cu}^{2+}] = 1/2K_a[\text{L}]_T \cdot x/(1-x^2) + [\text{L}]_T/2 \cdot x \text{ and}$$
$$[\text{Fe}^{3+}] = 1/3K_a[\text{L}]_T \cdot x/(1-x^3) + [\text{L}]_T/3 \cdot x$$

Where  $K_a$  is complex association constant;  $[\text{Cu}^{2+}]$  and  $[\text{Fe}^{3+}]$  are the concentrations of  $\text{Cu}^{2+}$  and  $\text{Fe}^{2+}$  ions;  $[\text{L}]_T$  is the initial concentration of sample;  $x=I-I_0/I_{\text{max}}-I_0$ ;  $I$ ,  $I_0$  and  $I$  is the absorption intensity at 455 nm (**P1**) or 495 nm (**A1**) of respective species, free ligand and the absorption intensity at 455 nm (**P1**) or 495 nm (**A1**) upon the addition of  $\text{Cu}^{2+}$  and  $\text{Fe}^{3+}$ , respectively.

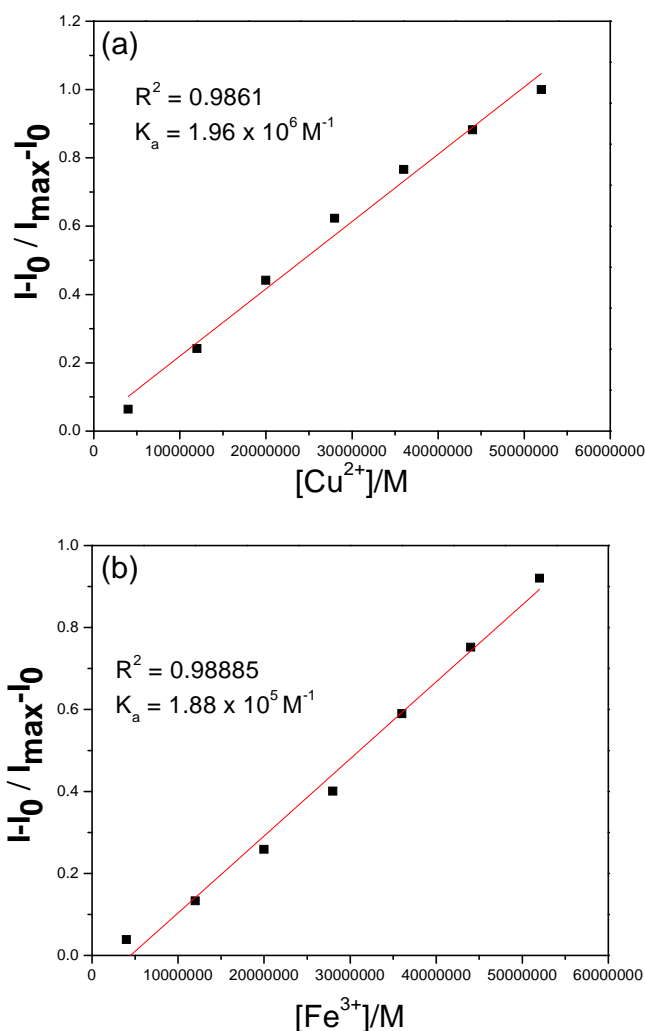

**Fig. S13** Determination of association constants of (a) **P1**+ $\text{Cu}^{2+}$  and (b) **A1**+ $\text{Fe}^{3+}$  based on linear least square fitting.

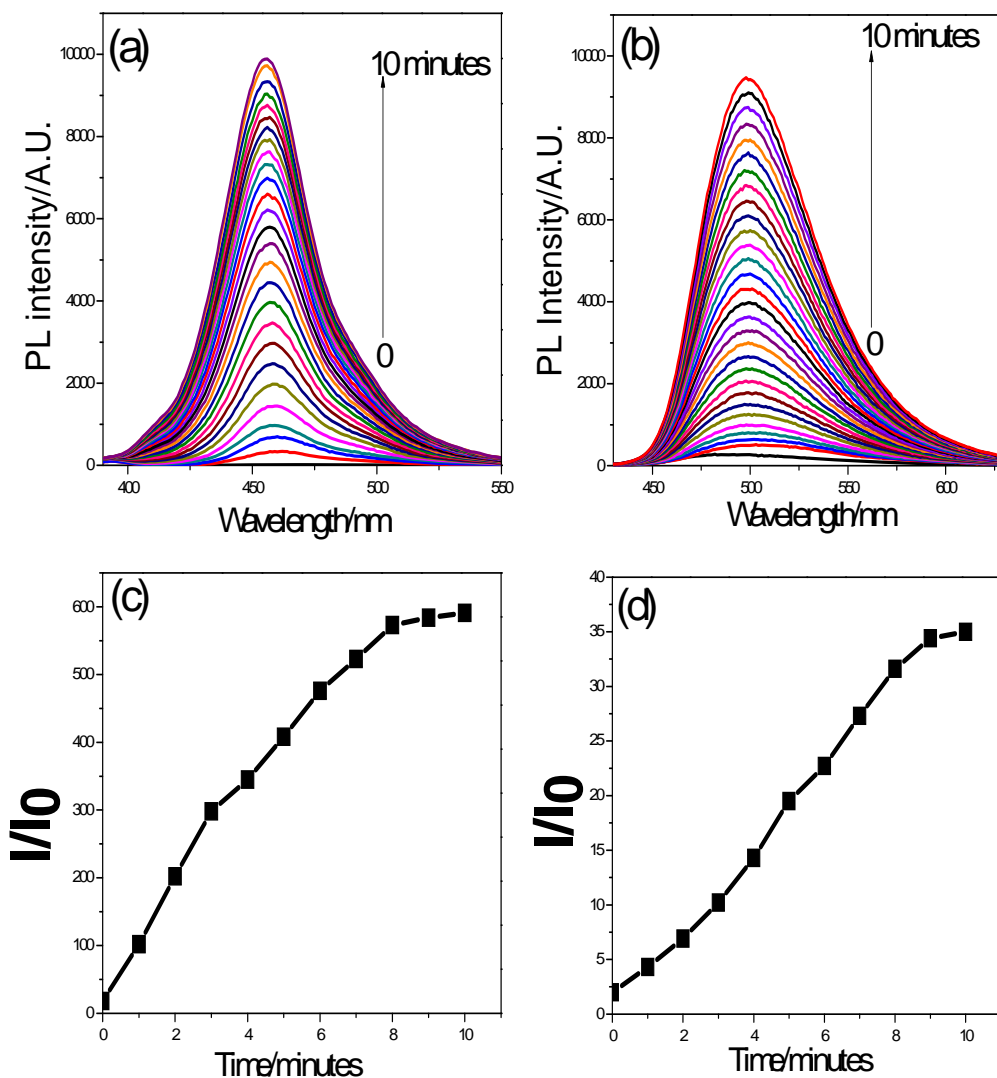

**Fig. S14** Time dependent fluorescence spectral changes of (a) **P1** (20  $\mu\text{M}$ ) in  $\text{CH}_3\text{CN}$  ( $\lambda_{\text{ex}} = 395$  nm) with 10  $\mu\text{M}$   $\text{Cu}^{2+}$  in  $\text{H}_2\text{O}$  and (b) **A1** (20  $\mu\text{M}$ ) in THF ( $\lambda_{\text{ex}} = 395$  nm) with 10  $\mu\text{M}$   $\text{Fe}^{3+}$  in  $\text{H}_2\text{O}$  (each measurement carried out at equal span of 20 seconds). (c and d) relative fluorescence intensity changes of **P1** and **A1**, respectively, as a function of time (0-10 min.).

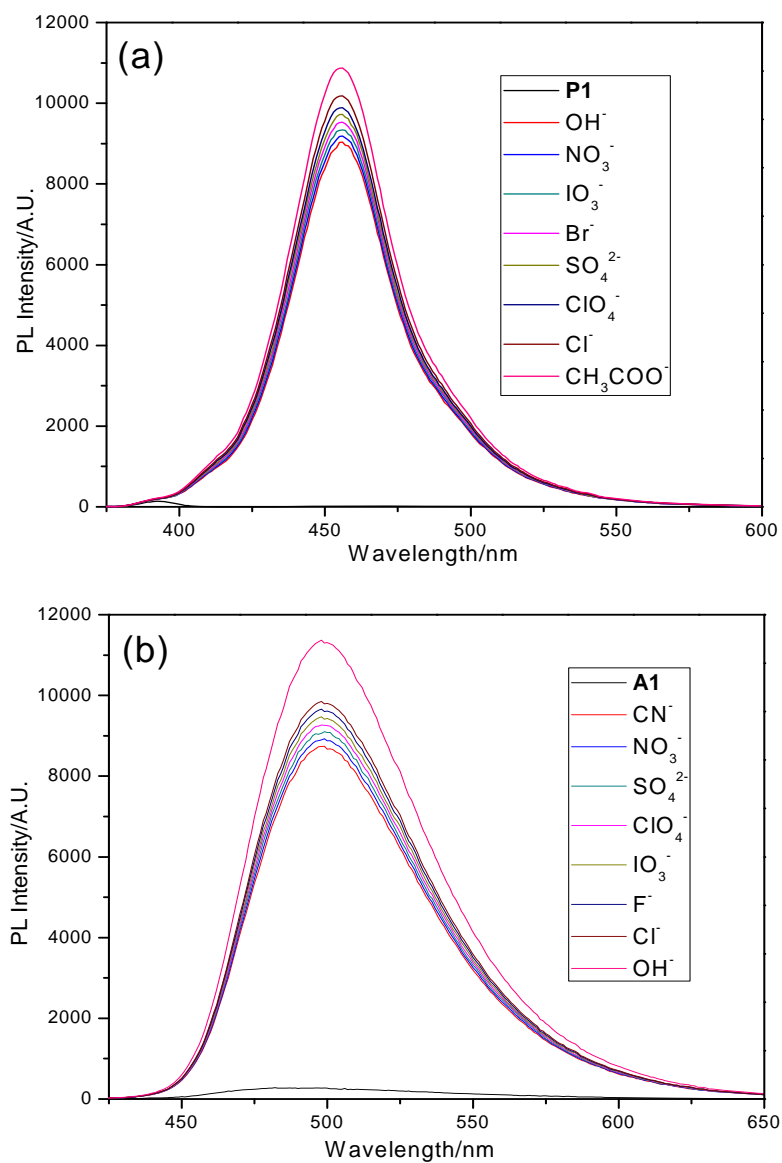

**Fig. S15** Sensor responses of (a) **P1** and (b) **A1** towards Cu<sup>2+</sup> and Fe<sup>3+</sup> in presence of different counter ions ( for Cu<sup>2+</sup> sensors CH<sub>3</sub>COO<sup>-</sup>, NO<sub>3</sub><sup>-</sup>, Cl<sup>-</sup>, Br<sup>-</sup>, OH<sup>-</sup>, ClO<sub>4</sub><sup>-</sup>, IO<sub>3</sub><sup>-</sup> and SO<sub>4</sub><sup>2-</sup> and for Fe<sup>3+</sup> sensors CN<sup>-</sup>, NO<sub>3</sub><sup>-</sup>, Cl<sup>-</sup>, F<sup>-</sup>, OH<sup>-</sup>, ClO<sub>4</sub><sup>-</sup>, IO<sub>3</sub><sup>-</sup> and SO<sub>4</sub><sup>2-</sup> were taken as counter ions)

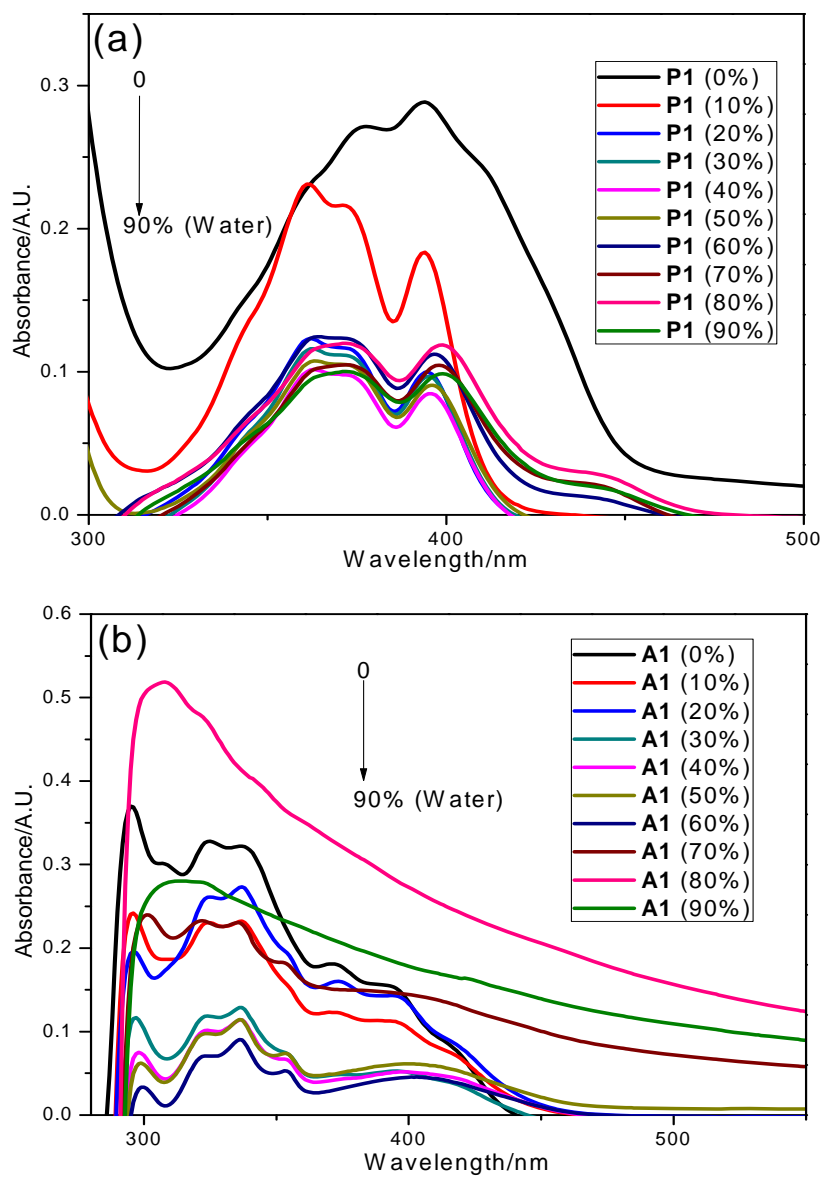

**Fig. S16** Absorbance spectral changes of (a) **P1** and (b) **A1**, upon increasing the concentration of water (0-90%) (Note: the spectra were taken after 18 hours).



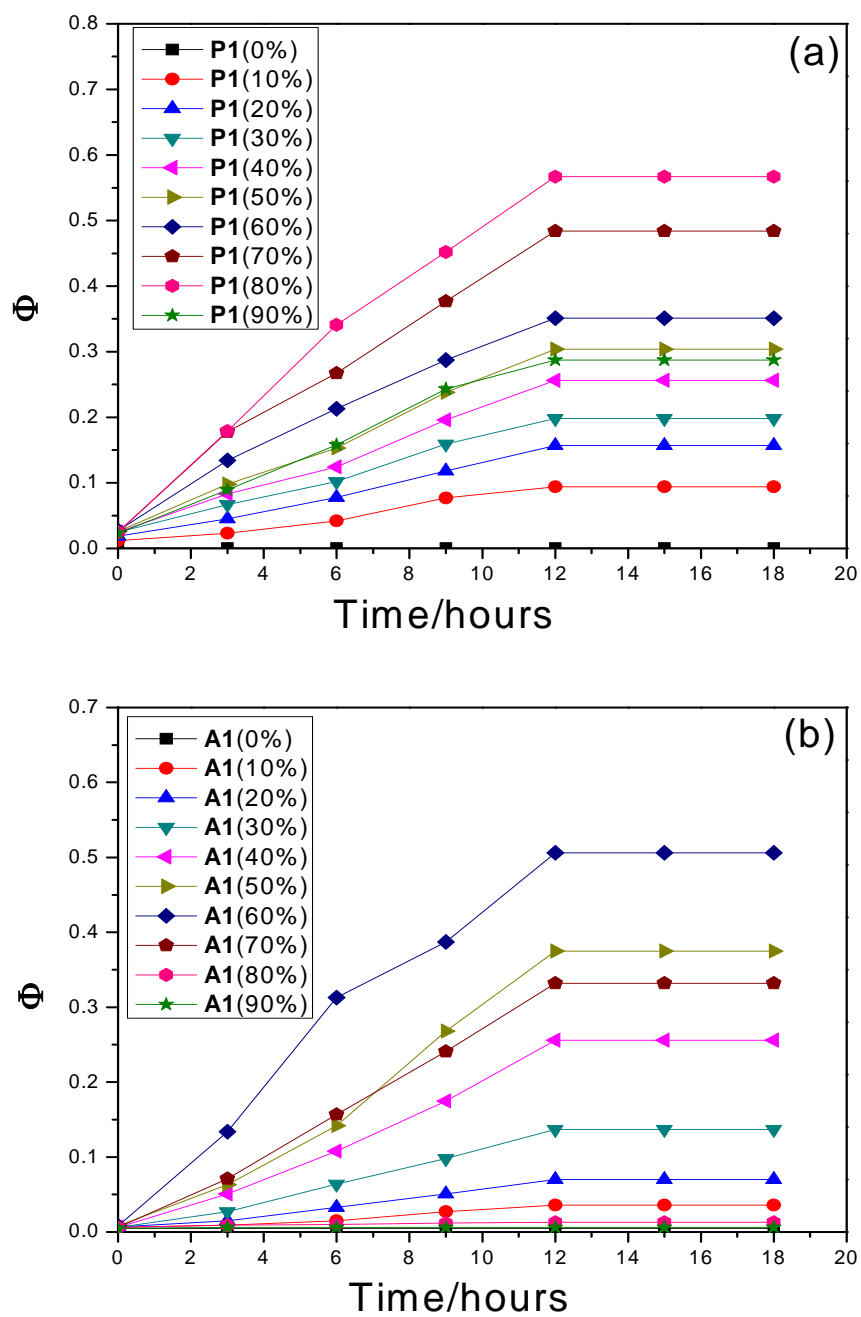

**Fig. S17** Quantum yield ( $\Phi$ ) changes of (a) P1 and (b) A1, upon increasing the concentration of water (0-90%) as a function of time (0-18 hours).

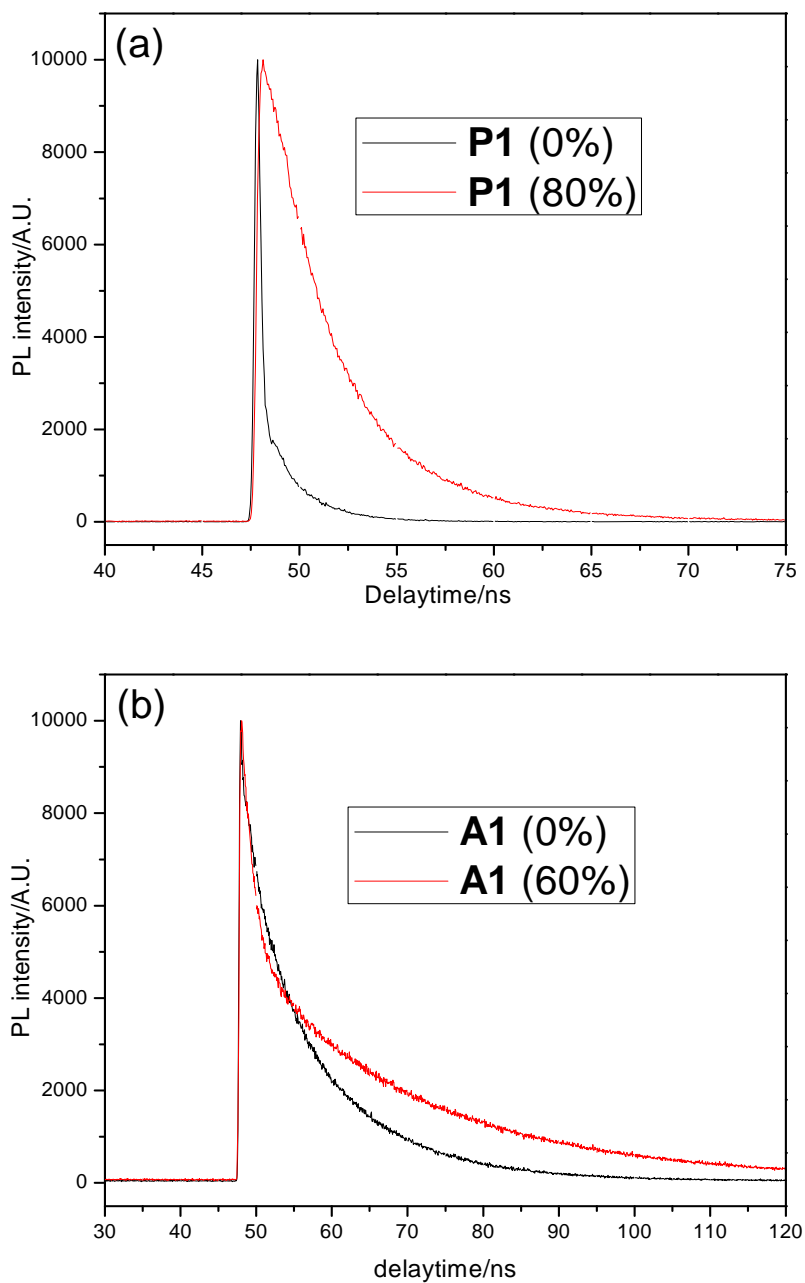

**Fig. S18** Time resolved fluorescence spectra (TRPL) of (a) **P1** in CH<sub>3</sub>CN (0% and 80% of water) and (b) **A1** in THF (0% and 60% of water) measured after 18 hours.

**Table S1.** Time-resolved fluorescence decay constants of **P1** and **A1**, sensor complexes and their aggregation induced emissions concentrations.

| Compound                    | $\tau_1$ (ns) | $\tau_2$ (ns) | A <sub>1</sub> (%) | A <sub>2</sub> (%) | $\tau_{\text{Avg}}$ (ns) |
|-----------------------------|---------------|---------------|--------------------|--------------------|--------------------------|
| <b>P1</b>                   | 0.2321        | 1.8891        | 35.58              | 64.42              | 1.30                     |
| <b>P1</b> +Cu <sup>2+</sup> | 1.8491        | 6.9600        | 96.16              | 3.84               | 2.05                     |
| <b>P1</b> (80%)             | 3.2516        | 6.2960        | 71.31              | 28.69              | 4.13                     |
| <b>A1</b>                   | 3.4440        | 11.7947       | 14.31              | 85.69              | 10.60                    |
| <b>A1</b> +Fe <sup>3+</sup> | 5.9450        | 14.0700       | 23.51              | 76.49              | 12.46                    |
| <b>A1</b> (60%)             | 1.9563        | 24.17         | 8.40               | 91.60              | 22.30                    |

### Notes and References

- 1 R. A. Robinson, and R. H. Stokes, *Electrolyte solutions" 2nd ed., rev.*, 1968, London, Butterworths.
- 2 K. Krzysztof, I. and Kuzniarska-Biernacka, *Struct. Chem.*, 2010, **21**, 357.
- 3 C. G. Freiherr von Richthofen, A. Stammeler, H. Bogge, and T. Glaser, *J. Org. Chem.*, 2012, **77**, 1435.
- 4 Q. Mei, L. Wang, B. Tian, F. Yan, B. Zhang, W. Huang, and B. Tong, *New J. Chem.*, 2012, **36**, 1879.
- 5 Y. Kubo, M. Kato, Y. Misawa, and S. Tokita, *Tetrahedron Lett.*, 2004, **45**, 3769.
